# Supplementary material for: Functional Living Skills: A Non-Immersive Virtual Reality Training for Individuals with Major Neurocognitive Disorders
Source: MDPI journal article supplement (doi:10.3390/s21175751), 2021-08-26
Supplement: s1 [file s1]

## Description of apps in details

| Title of apps      | Initial Instruction (vocal and written)                                                                                                                                           | Optional video-demonstration | App Content and Scenes                                                                                                                                                                                                                                                                                                   | Max latency time for each action / response | Number of subsequent actions / responses | Number of clues for each incorrect responses | Clues description                                                        | Type of clues          | Type of reinforcement of each correct response                                                                                                                                                           | Schedule of reinforcement                                                                                          |
|--------------------|-----------------------------------------------------------------------------------------------------------------------------------------------------------------------------------|------------------------------|--------------------------------------------------------------------------------------------------------------------------------------------------------------------------------------------------------------------------------------------------------------------------------------------------------------------------|---------------------------------------------|------------------------------------------|----------------------------------------------|--------------------------------------------------------------------------|------------------------|----------------------------------------------------------------------------------------------------------------------------------------------------------------------------------------------------------|--------------------------------------------------------------------------------------------------------------------|
| <b>Information</b> | "Now you will be asked some questions, please click on the button corresponding to the answer you think is correct. Good job!"                                                    | NO                           | Number of scenes: 1<br><br>30 questions appearing on the screen, one at a time, in verbal and written form, with multiple-choice answers; questions focus on general knowledge, personal, family, spatial and temporal orientation.                                                                                      | 15 sec                                      | 30                                       | 1                                            | The correct response is highlighted intermittently                       | Visual clue            | Vocal positive rewards, such as "well done", "congratulation", "you are working carefully". At the end of the task a general reward ("Well done! You worked carefully") along with applause is provided. | Variable ratio: VR2 or VR3 (reinforcement were provided in a variable way every two or three responses on average. |
| <b>Medicines</b>   | "On the table there are some medicines and a reminder showing the times in which they must be taken. Now you will be given a time and you will touch the right medicine to take". | YES                          | Number of scenes: 1<br><br>Five medicine boxes are placed on a kitchen table, verbal instructions and a visual reminder explain when each drug should be taken; the patient is required to respond to 10 verbal requests, randomly presented during each session. The visual reminder is always available on the screen. | 15 sec                                      | 10                                       | 1                                            | The correct response is highlighted intermittently and vocally suggested | Vocal and visual clues | Vocal positive rewards, such as "well done", "congratulation", "you are working carefully". At the end of the task a general reward ("Well done! You worked carefully") along with applause is provided. | Variable ratio: VR2 or VR3                                                                                         |
| <b>Suitcase</b>    | "You have to                                                                                                                                                                      | YES                          | Number of scenes: 1                                                                                                                                                                                                                                                                                                      | 15 sec                                      | 11                                       | 3, least to                                  | 1: a voice tells the                                                     | 1:                     | Vocal positive                                                                                                                                                                                           | Variable ratio:                                                                                                    |

|                    |                                                                                                                                                                                                                           |     |                                                                                                                                                                                                                                                                                                                                                                                                                                                                                                                                                                |        |    |                  |                                                                                                                                                           |                                                        |                                                                                                                                                                                                             |                            |
|--------------------|---------------------------------------------------------------------------------------------------------------------------------------------------------------------------------------------------------------------------|-----|----------------------------------------------------------------------------------------------------------------------------------------------------------------------------------------------------------------------------------------------------------------------------------------------------------------------------------------------------------------------------------------------------------------------------------------------------------------------------------------------------------------------------------------------------------------|--------|----|------------------|-----------------------------------------------------------------------------------------------------------------------------------------------------------|--------------------------------------------------------|-------------------------------------------------------------------------------------------------------------------------------------------------------------------------------------------------------------|----------------------------|
|                    | go out for a weekend.<br>Prepare a suitcase with a complete change of clothes, including the hygienic bag. When you are done, close the suitcase"                                                                         |     | Clothes to be placed in a suitcase are shown in some shelves. Patients are requested to perform dragging actions to put clothes in the suitcase.                                                                                                                                                                                                                                                                                                                                                                                                               |        |    | most             | patient what to do<br>2: the correct response is brighten for 3 sec<br>3: the computer performs the action and goes to the next step                      | vocal clue<br>2: vocal and visual clue<br>3: visual    | rewards, such as "well done", "congratulation", "you are working carefully".<br>At the end of the task a general reward ("Well done! You worked carefully") along with applause is provided.                | VR2 or VR3                 |
| <b>Supermarket</b> | "You have to go shopping. Read the shopping list aloud, and click on each product in the list. Then, take the money to buy the 5 products, and put the list and the money in your wallet. Finally, go to the supermarket" | YES | Number of scenes: 3<br><br>The first scene is a kitchen, with a shopping list (which varies every day), money and wallet; patient is required to take money, put it in the wallet, and to take the shopping list. He / she can control the shopping list at any time during the task. In the second scene patient has to take the listed products from a supermarket shelf and then put them in a shopping cart. In the third scene the patient has to pay for products at the cash counter. Patient is requested to perform dragging actions during the task. | 15 sec | 17 | 3, least to most | 1: a voice tells the patient what to do<br>2: the correct response is brighten for 3 sec<br>3: the computer performs the action and goes to the next step | 1: vocal clue<br>2: vocal and visual clue<br>3: visual | Vocal positive rewards, such as "well done", "congratulation", "you are working carefully".<br>At the end of the task a general reward ("Well done! You worked carefully") along with applause is provided. | Variable ratio: VR2 or VR3 |

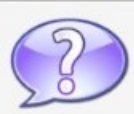

## Che lavoro svolgi o svolgevi?

Operaio

Elettricista

Psicologo

Disoccupato

Regista

Ingegnere



## MEDICINE DA PRENDERE

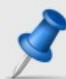

**INTEGRATORE VITAMINICO**  
LA MATTINA DOPO COLAZIONE

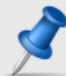

**ANTIBIOTICO**  
LA MATTINA ALLE 11:00

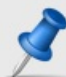

**CARDIO ASPIRINA**  
DOPO PRANZO

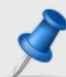

**ANTIDOLORIFICO**  
IL POMERIGGIO DOPO LA MERENDA

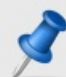

**MIORILASSANTE RELAX**  
LA SERA ALLE ORE 22:00

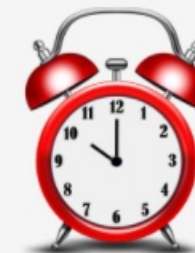

Ha appena finito di  
cenare, quale  
medicina bisogna  
prendere?

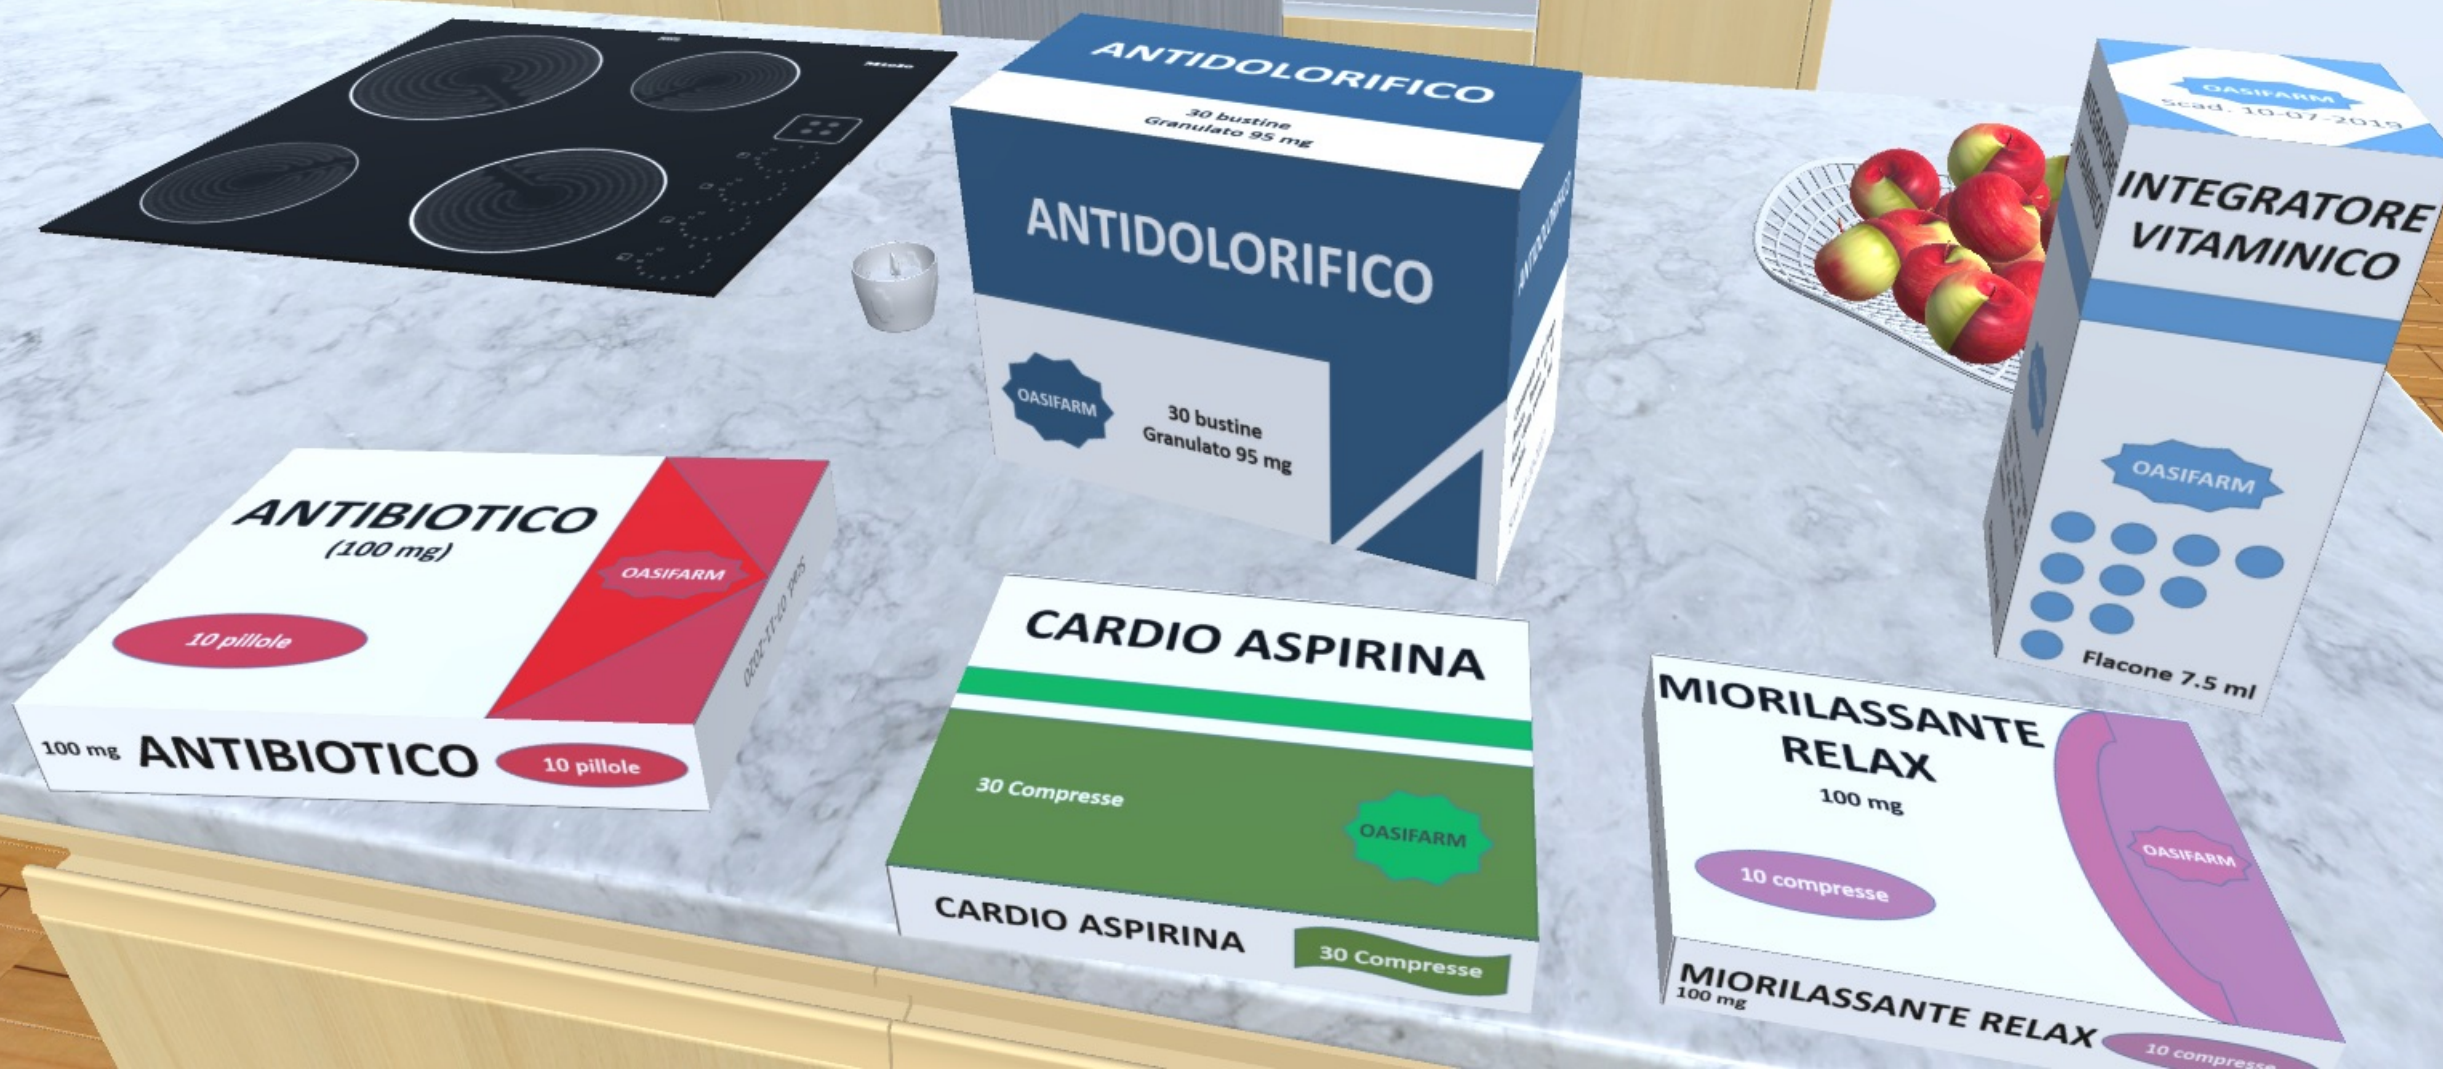



Visualizza  
consegna

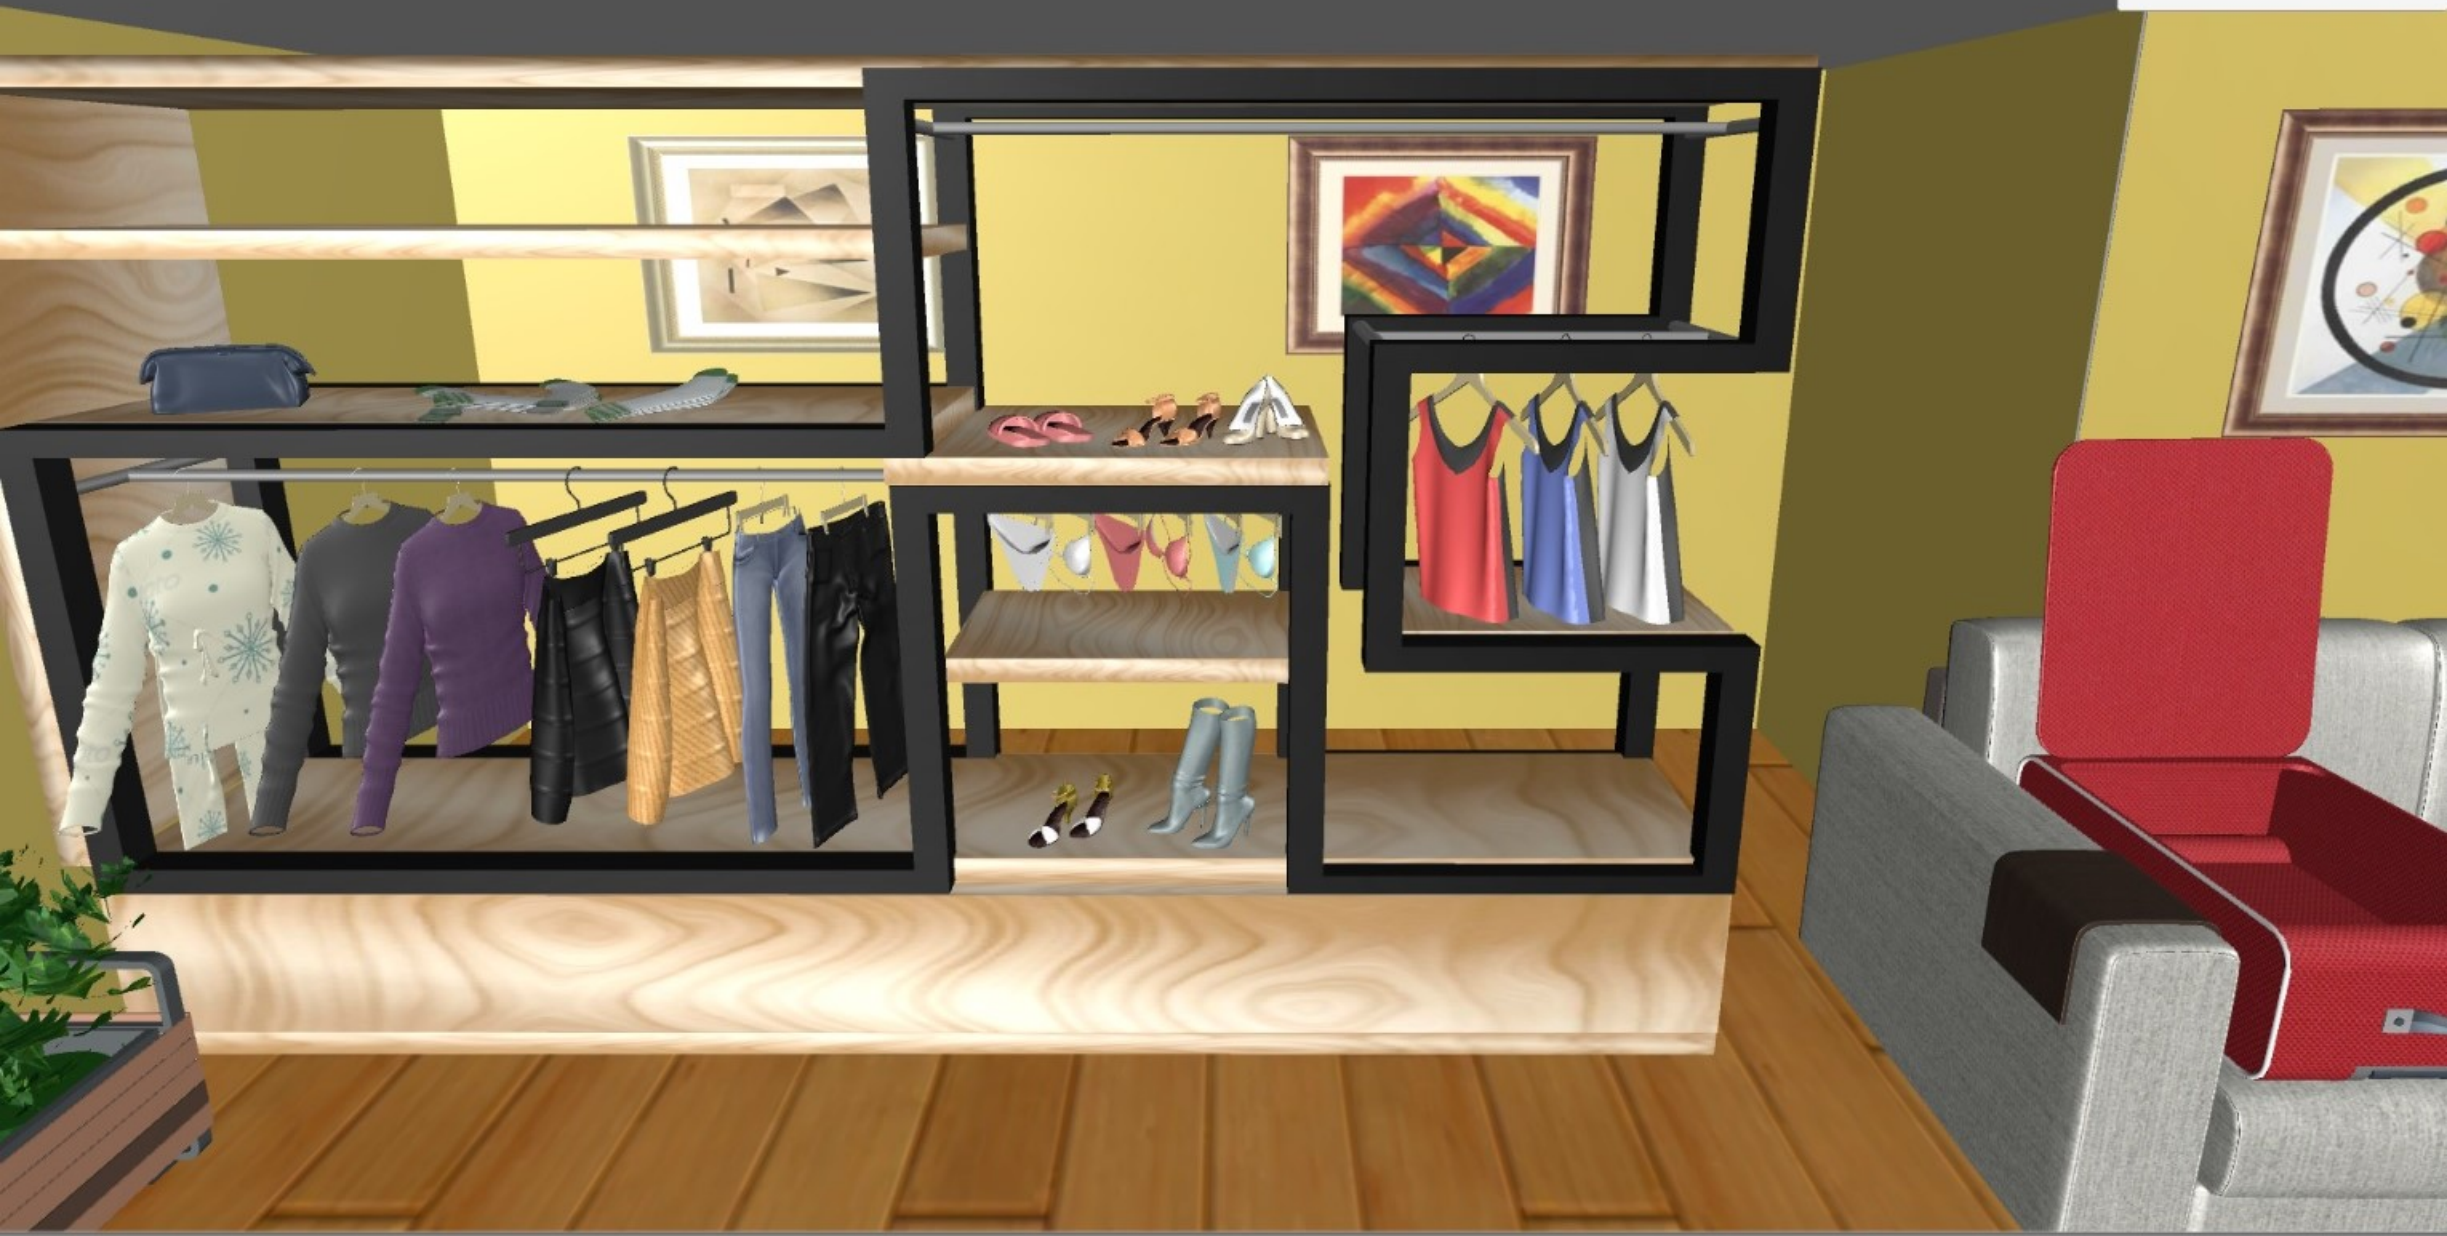



## Lista della spesa

|                             |        |
|-----------------------------|--------|
| 1 paio di guanti da cucina  | € 2,00 |
| 1 bottiglia di thé          | € 1,50 |
| 1 pacco di fette biscottate | € 2,50 |
| 1 kg di pasta               | € 1,00 |
| 1 litro di olio di semi     | € 1,00 |

Visualizza  
consegna

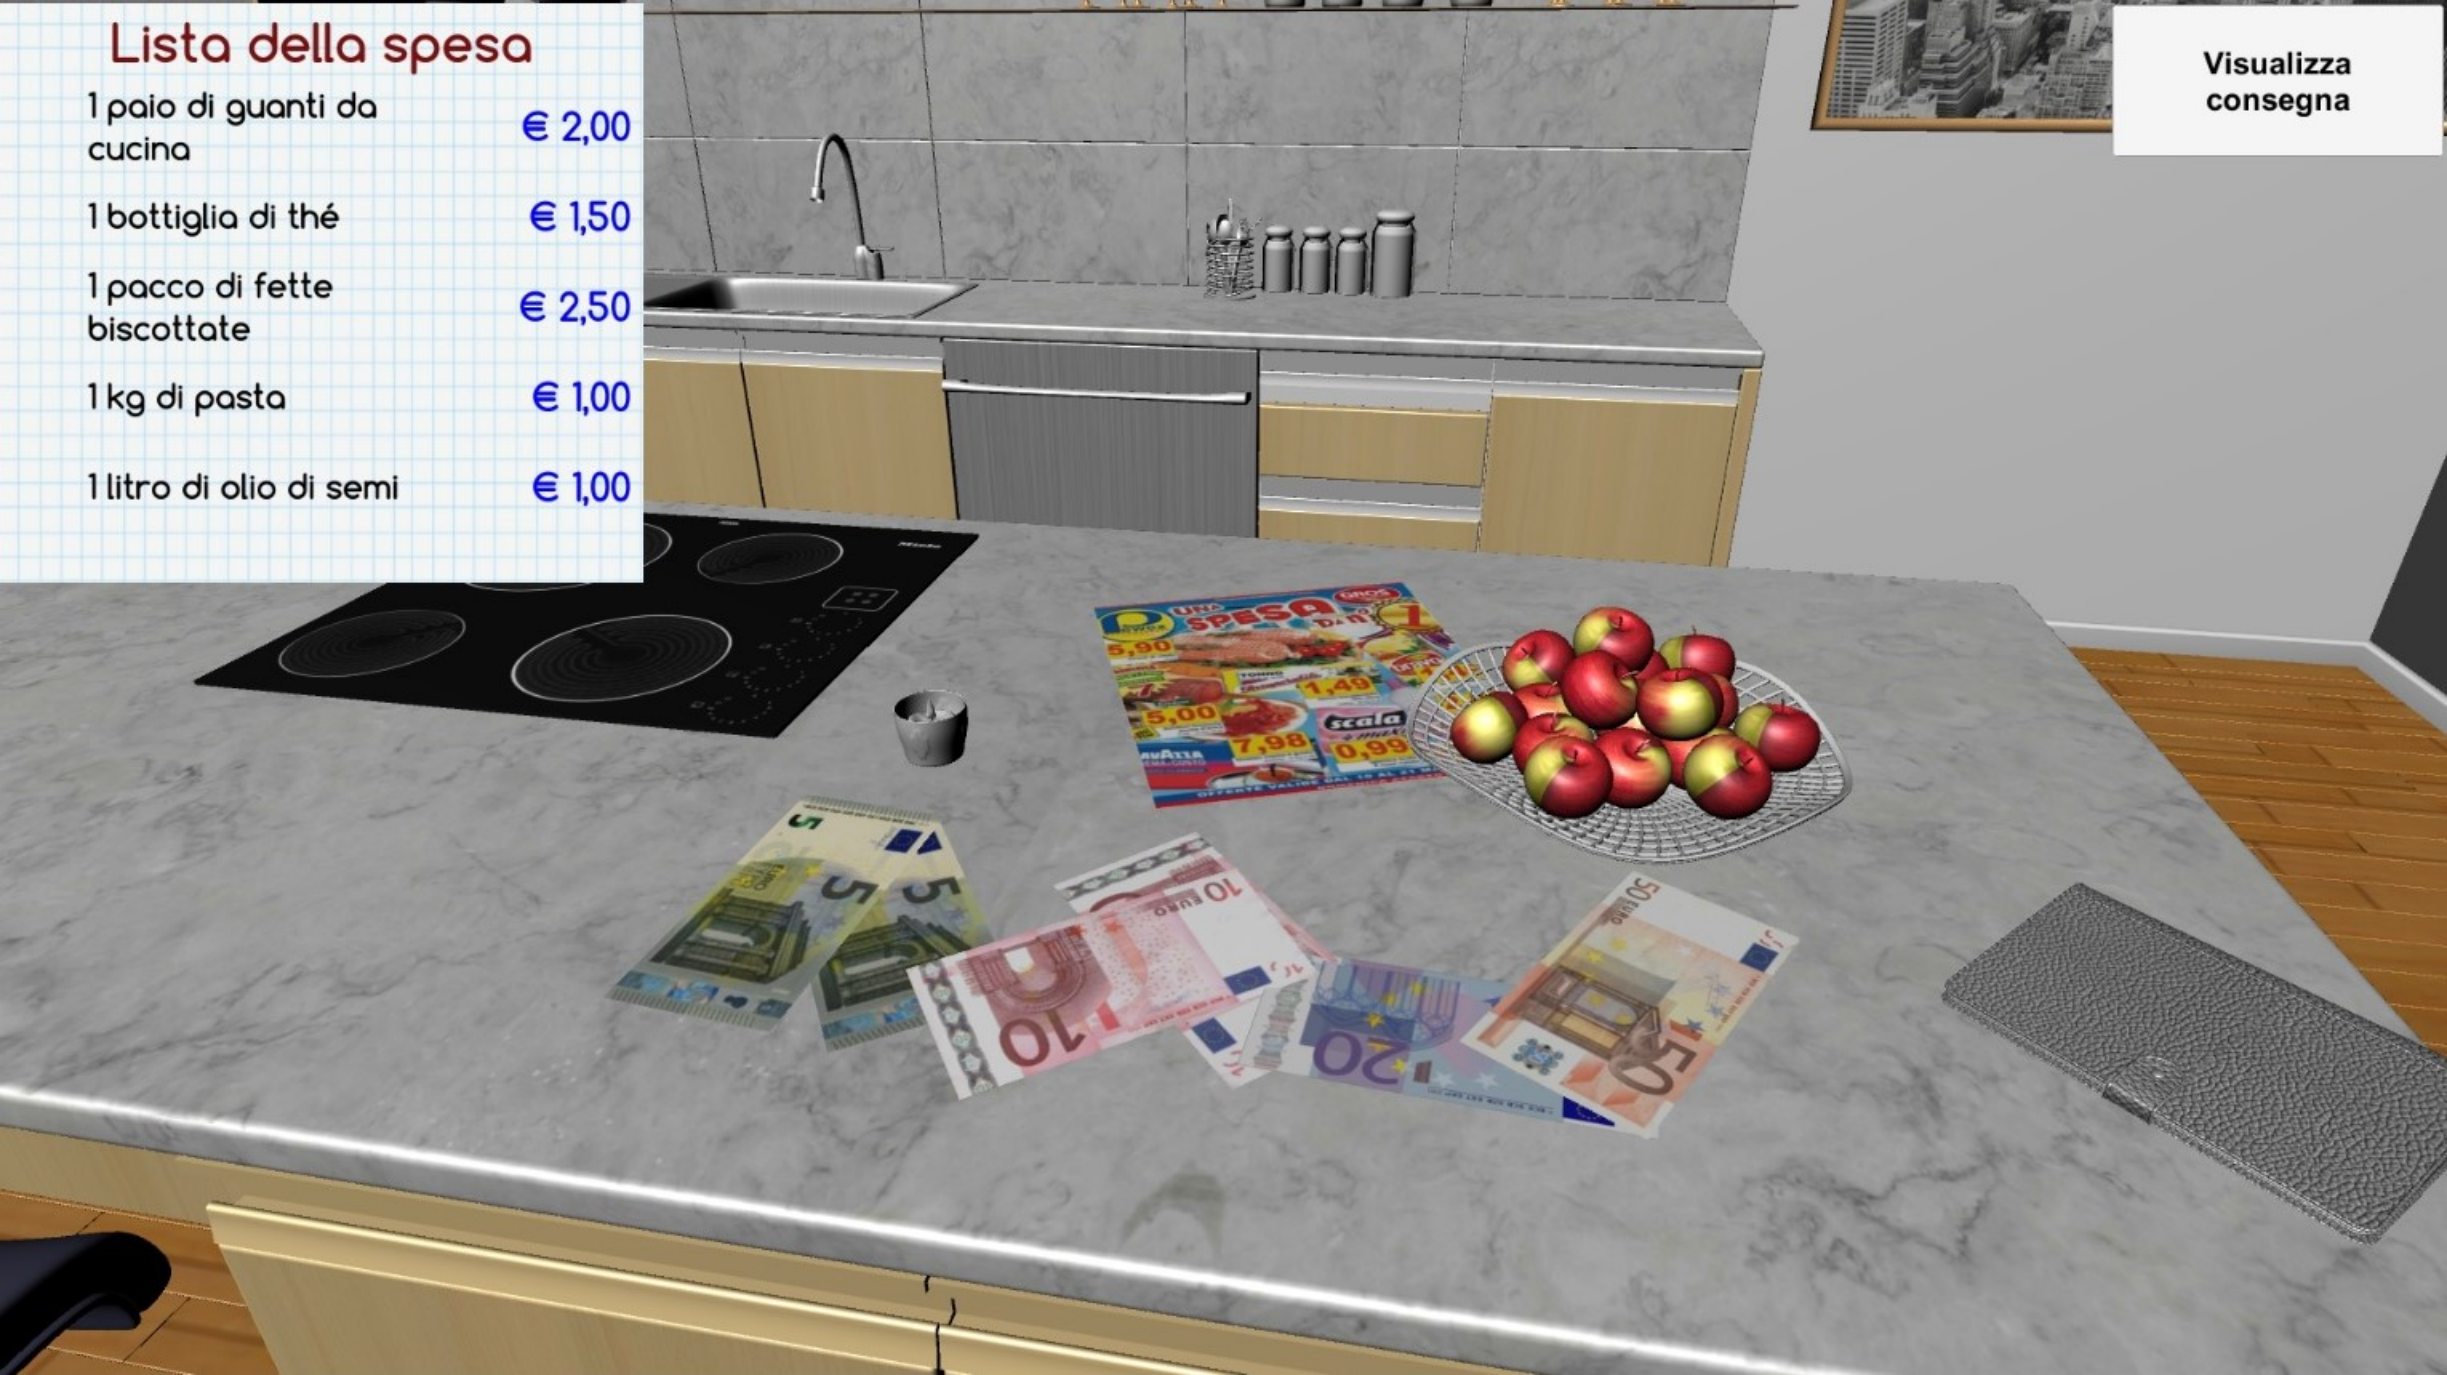



Visualizza  
lista prodotti

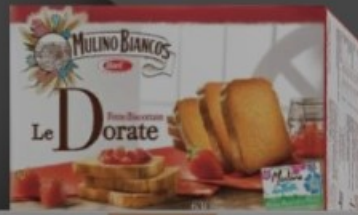

2,50 €

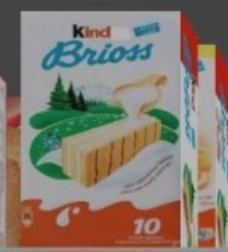

3,00 €

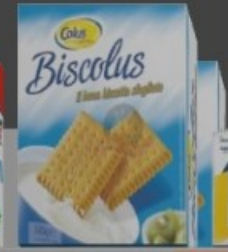

4,00 €

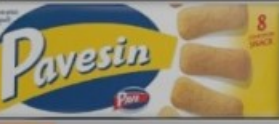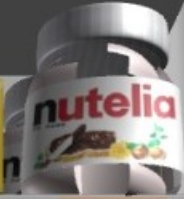

3,00 €

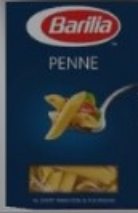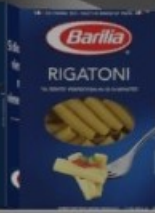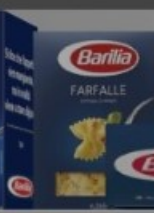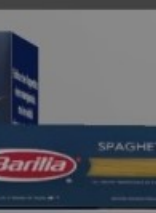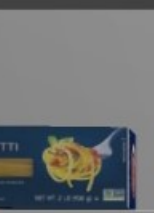

1,00 €

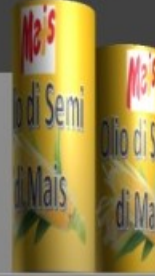

1,00 €

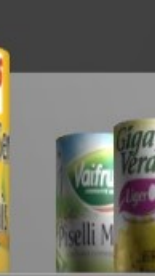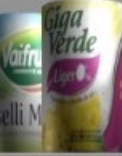

1,50 €

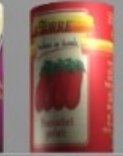

1,50 €

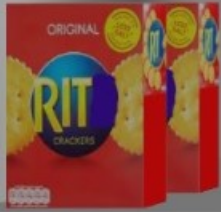

2,50 €

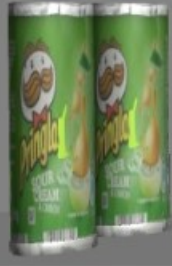

1,00 €

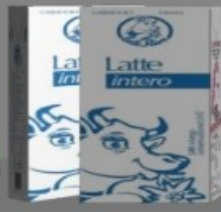

1,00 €

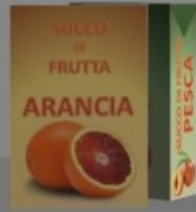

1,50 €

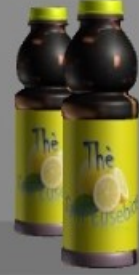

1,50 €

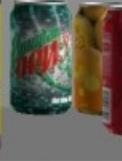

1,00 €

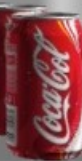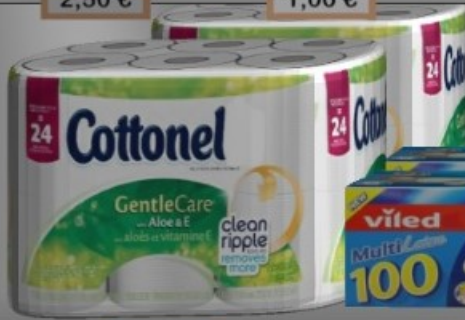

2,00 €

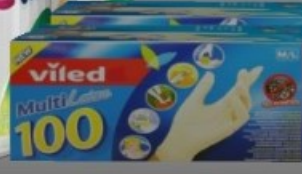

2,00 €

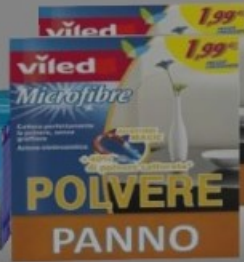

0,50 €

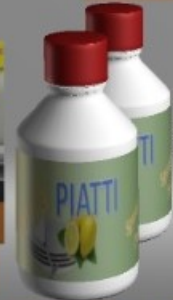

1,50 €

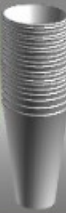

1,00 €

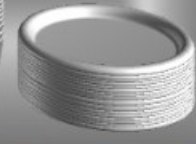

2,50 €

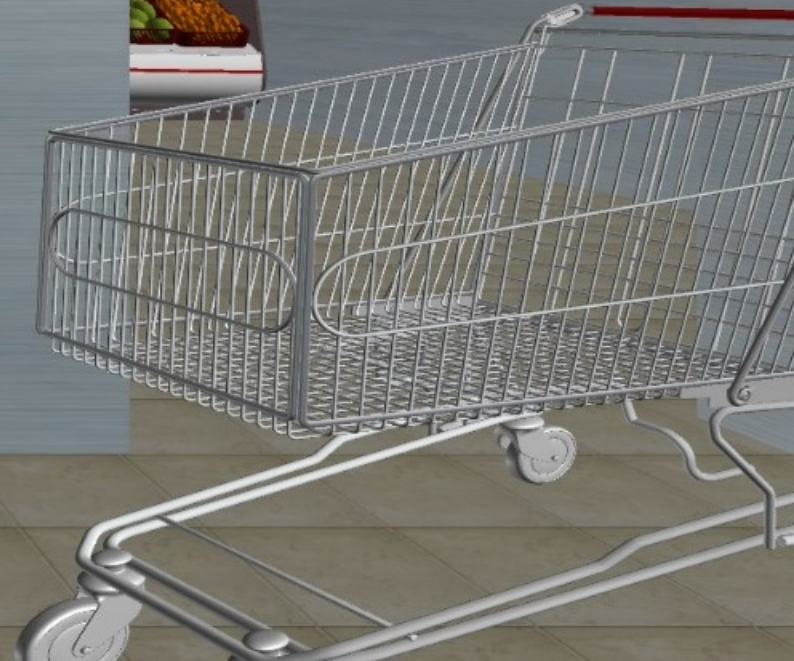



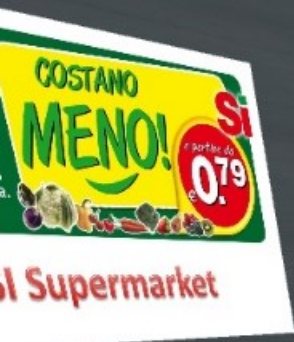

OASI Supermarket

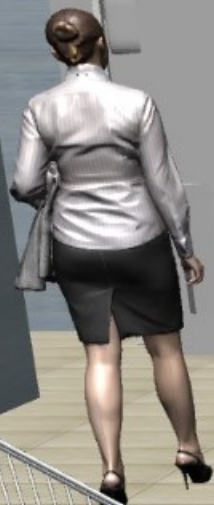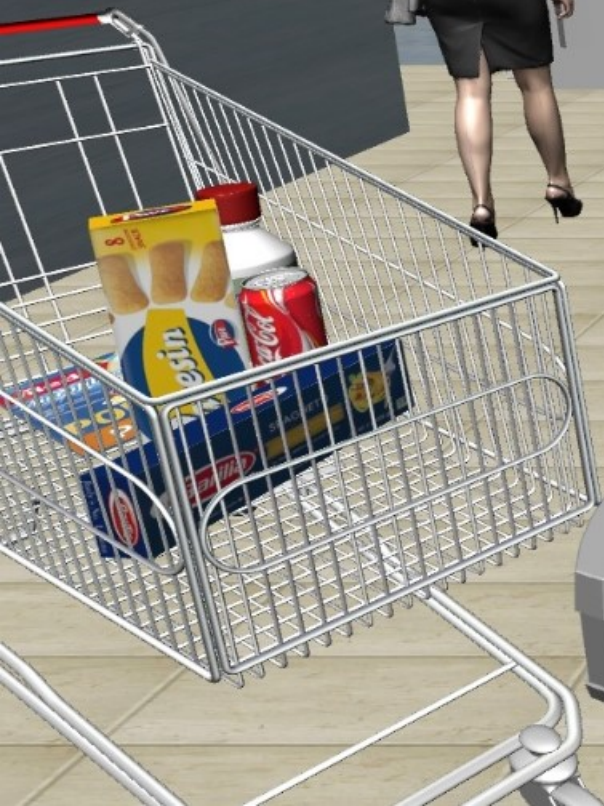

**DAL 13 AL 18 GIUGNO 2015**

*settimana dell'*  
**ORTOFRUTTA**

**OGNI 10 EURO** DI SPESA AL REPARTO ORTOFRUTTA,  
FINO AD UN VALORE **MASSIMO DI 40 EURO**  
(SCONTRINO UNICO NON CUMULABILE) RICEVERAI



**BUONO SCONTO € 2,00**

UTILIZZABILE SU TUTTA LA SPESA  
**DAL 22 AL 28 GIUGNO**

**OASI Supermarket**





| ID | EG 1 - CG 2 | VT sessions | etiology: Alzheimer=1; other degenerative=2; vascular =3; other=4 | Years of Education | Chron. age | Male 1 Female 2 | pre MMSE | post MMSE | pre CPM | post CPM | pre Corsi span | post Corsi span | pre digit span | post digit span | pre 15 rey words: immediate recall | post 15 rey words: immediate recall | pre 15 rey words: delayed recall | post 15 rey words: delayed recall | pre FAB scores | post FAB scores | pre ADL scores | post ADL scores | pre IADL: % of maintained abilities | post IADL: % of maintained abilities | number of devices used | satisfaction questionnaire positive items (MAX scores=16) | satisfaction questionnaire negative items (MAX scores=12) |   |
|----|-------------|-------------|-------------------------------------------------------------------|--------------------|------------|-----------------|----------|-----------|---------|----------|----------------|-----------------|----------------|-----------------|------------------------------------|-------------------------------------|----------------------------------|-----------------------------------|----------------|-----------------|----------------|-----------------|-------------------------------------|--------------------------------------|------------------------|-----------------------------------------------------------|-----------------------------------------------------------|---|
| 1  | 1           | 10          |                                                                   | 2                  | 5          | 59              | 2        | 16.97     | 21.97   | 24.5     | 25.5           | 4.35            | 4.35           | 4.29            | 4.29                               | 22.4                                | 28.4                             | 6.2                               | 7.2            | 6               | 10             | 6               | 6                                   | 75                                   | 75                     | 2                                                         | 12                                                        | 1 |
| 2  | 1           | 12          |                                                                   | 4                  | 3          | 78              | 2        | 19.5      | 25.24   | 19.5     | 28.5           | 3.02            | 4.02           | 4.96            | 3.96                               | 33.2                                | 37                               | 6.8                               | 9.1            | 6               | 10             | 4               | 4                                   | 62.5                                 | 62.5                   | 1                                                         | 13                                                        | 0 |
| 3  | 1           | 20          |                                                                   | 3                  | 8          | 54              | 2        | 25.7      | 29.97   | 32.5     | 33.5           | 4.35            | 4.35           | 4.04            | 4.04                               | 40.07                               | 41.07                            | 5.02                              | 8.02           | 10              | 15             | 5               | 5                                   | 62.5                                 | 62.5                   | 2                                                         | 14                                                        | 0 |
| 4  | 1           | 12          |                                                                   | 3                  | 5          | 62              | 1        | 16.27     | 21.27   | 30.5     | 30.5           | 3.56            | 2.56           | 4.29            | 4.29                               | 17.1                                | 19.1                             | 3.8                               | 3.8            | 8               | 10             | 6               | 6                                   | 37.5                                 | 37.5                   | 1                                                         | 12                                                        | 1 |
| 5  | 1           | 10          |                                                                   | 3                  | 5          | 69              | 2        | 19.27     | 25.27   | 22       | 25             | 4.36            | 4.36           | 4.51            | 4.51                               | 41                                  | 44                               | 9.4                               | 7.4            | 8               | 11             | 4               | 4                                   | 37.5                                 | 37.5                   | 1                                                         | 10                                                        | 0 |
| 6  | 1           | 16          |                                                                   | 3                  | 8          | 68              | 1        | 23.53     | 26.53   | 17.5     | 22.5           | 3.44            | 3.44           | 5.35            | 6.35                               | 22.9                                | 39.9                             | 1.9                               | 3.9            | 10.7            | 11.7           | 5               | 5                                   | 37.5                                 | 37.5                   | 1                                                         | 10                                                        | 0 |
| 7  | 1           | 15          |                                                                   | 3                  | 5          | 65              | 1        | 20.27     | 25.27   |          |                | 4.25            | 4.25           | 3.39            | 3.39                               |                                     | 41.1                             |                                   | 6.8            |                 |                |                 | 62.5                                | 62.5                                 | 1                      | 12                                                        | 0                                                         |   |
| 8  | 1           | 20          |                                                                   | 2                  | 8          | 62              | 2        | 20.53     | 23.53   | 20.5     | 19.5           | 5.5             | 5.5            | 4.35            | 4.35                               | 28                                  | 27                               | 5.5                               | 5.3            | 8               | 8              | 4               | 4                                   | 62.5                                 | 62.5                   | 1                                                         | 10                                                        | 0 |
| 9  | 1           | 20          |                                                                   | 1                  | 8          | 71              | 1        | 17.2      | 18.2    | 26.5     | 27.5           | 5.36            | 5.36           | 4.49            | 4.49                               | 28.9                                | 31.9                             | 3.6                               | 2.6            | 8               | 11             | 6               | 6                                   | 12.5                                 | 12.5                   | 4                                                         | 10                                                        | 0 |
| 10 | 1           | 20          |                                                                   | 3                  | 8          | 68              | 1        | 20.53     | 24.53   | 26.5     | 30.5           |                 | 3.35           | 2.35            |                                    | 30.9                                | 49.9                             | 5.9                               | 8.9            | 8               | 9              | 2               | 2                                   | 12.5                                 | 12.5                   | 2                                                         | 13                                                        | 0 |
| 11 | 1           | 13          |                                                                   | 3                  | 3          | 59              | 1        | 18.24     | 20.2    | 18       | 18             | 4.69            | 3.69           | 3.43            | 4.43                               |                                     |                                  |                                   |                |                 |                | 3               | 3                                   | 25                                   | 25                     | 1                                                         | 14                                                        | 0 |
| 12 | 1           | 12          |                                                                   | 4                  | 5          | 74              | 1        | 24.03     | 26.03   | 31       | 32             | 4.69            | 4.69           | 4.65            | 4.65                               | 28                                  | 34                               | 0                                 | 5.1            | 11              | 9              | 3               | 3                                   | 25                                   | 25                     | 1                                                         | 5                                                         | 1 |
| 13 | 1           | 17          |                                                                   | 3                  | 5          | 71              | 2        | 19.9      | 21.03   | 22       | 17.4           | 4.66            | 4.66           | 4.65            | 4.65                               | 40                                  | 43                               | 8.4                               | 6.4            | 6               | 11             | 6               | 6                                   | 25                                   | 25                     | 1                                                         | 8                                                         | 1 |
| 14 | 1           | 20          |                                                                   | 1                  | 8          | 80              | 1        | 22.2      | 28.2    | 23.5     | 18.5           | 3               | 4              | 5.65            | 6.65                               | 22.1                                | 34.1                             | 3.3                               | 6.3            | 16              | 15             | 5               | 5                                   | 37.5                                 | 37.5                   | 1                                                         | 8                                                         | 0 |
| 15 | 1           | 20          |                                                                   | 1                  | 13         | 61              | 1        | 19.49     | 24.49   | 17.5     | 19.5           | 5.85            | 4.85           | 5.02            | 5.02                               | 12.3                                | 19.3                             | 1.6                               | 2.6            | 9               | 10             | 6               | 6                                   | 25                                   | 25                     | 4                                                         | 13                                                        | 1 |
| 16 | 1           | 20          |                                                                   | 1                  | 5          | 77              | 1        | 22.03     | 23.03   | 24       | 24             | 3.25            | 3.25           | 6.82            | 5.82                               | 20                                  | 21                               | 3.1                               | 3.1            | 10              | 9              | 6               | 6                                   | 37.5                                 | 37.5                   | 1                                                         | 10                                                        | 1 |
| 17 | 1           | 20          |                                                                   | 1                  | 8          | 64              | 1        | 18.53     | 17.53   | 15.5     | 13.5           | 3.56            | 3.56           | 5.23            | 5.23                               | 27                                  | 27                               | 4.3                               | 3.3            | 12              | 12             | 6               | 6                                   | 25                                   | 25                     | 1                                                         | 14                                                        | 0 |
| 18 | 1           | 20          |                                                                   | 1                  | 5          | 70              | 2        | 14.03     | 16.03   | 15       | 22             | 4.66            | 4.66           | 3.51            | 4.51                               | 27                                  | 32                               | 2.4                               | 3.4            | 7               | 8              | 6               | 6                                   | 50                                   | 50                     | 1                                                         | 2                                                         | 1 |
| 19 | 1           | 20          |                                                                   | 1                  | 8          | 81              | 2        | 21.2      | 20.2    | 22.5     |                | 2.57            | 3.57           | 4.87            | 4.87                               | 27.1                                | 24.1                             | 3.3                               | 3.3            | 15              | 8              | 6               | 6                                   | 62.5                                 | 62.5                   | 1                                                         | 7                                                         | 0 |
| 20 | 1           | 15          |                                                                   | 3                  | 17         | 50              | 2        | 20.31     | 20.31   | 16.31    | 22             | 3.41            | 5.41           | 2.6             | 3.6                                | 22.7                                | 34.7                             | 0                                 | 0              | 13              | 13             | 3               | 3                                   | 12.5                                 | 12.5                   | 4                                                         | 16                                                        | 0 |
| 21 | 1           | 15          |                                                                   | 3                  | 13         | 81              | 2        | 12.86     | 23.86   | 19.5     | 29.5           | 3.15            | 3.15           | 4.44            | 5.44                               | 17.4                                | 25.4                             | 2.6                               | 2.6            |                 |                | 6               | 6                                   | 75                                   | 75                     | 2                                                         | 8                                                         | 0 |
| 22 | 1           | 20          |                                                                   | 4                  | 8          | 55              | 1        | 21.97     | 24.97   | 20.4     | 25.4           | 4.51            | 4.51           | 3.13            | 3.13                               | 22.3                                | 21.3                             | 0                                 | 0              | 11              | 15             | 6               | 6                                   | 12.5                                 | 12.5                   | 2                                                         | 16                                                        | 0 |
| 23 | 1           | 20          |                                                                   | 1                  | 18         | 82              | 1        | 21.85     | 23.85   | 20.8     | 27.8           | 3.69            | 3.69           | 2.36            | 2.36                               | 23.6                                | 37.6                             | 5.2                               | 7.2            | 10              | 15             | 6               | 6                                   | 50                                   | 50                     | 3                                                         | 2                                                         | 2 |
| 24 | 1           | 20          |                                                                   | 3                  | 5          | 74              | 2        | 17.03     | 19.03   | 18.2     | 24.2           | 2.15            |                | 4.65            | 4.65                               | 25                                  | 32                               | 3.1                               | 5.1            |                 |                | 6               | 6                                   | 87.5                                 | 87.5                   | 2                                                         | 12                                                        | 0 |
| A  | 2           | 0           |                                                                   | 2                  | 3          | 70              | 2        | 24.24     | 23.24   | 13.5     | 19.5           | 0.72            | 0.72           | 5.79            | 5.79                               | 31                                  | 48                               | 7.40                              | 9.40           | 5               | 6              | 6               | 6                                   | 62.5                                 | 62                     |                                                           |                                                           |   |
| B  | 2           | 0           |                                                                   | 2                  | 5          | 65              | 2        | 14.27     | 15.27   | 18.9     | 19.9           | 3.44            | 3.44           | 2.39            | 2.39                               | 6.1                                 | 13.1                             | 0.00                              | 0.00           | 4               | 4              | 6               | 6                                   | 62.5                                 | 37.5                   |                                                           |                                                           |   |
| C  | 2           | 0           |                                                                   | 4                  | 13         | 63              | 1        | 23.49     | 27.49   | 29.3     | 34.5           | 5               | 4              | 5.02            | 6.02                               | 25.03                               | 31.03                            | 1.06                              | 3.06           | 8               | 13             | 6               | 6                                   | 50                                   | 66                     |                                                           |                                                           |   |
| D  | 2           | 0           |                                                                   | 4                  | 8          | 57              | 1        | 20.97     | 22.97   | 25.5     | 28.5           | 4.15            | 4.15           | 4.13            | 5.13                               | 35.07                               | 44.07                            | 6.02                              | 8.02           | 13              | 15             | 6               | 6                                   | 62.5                                 | 83                     |                                                           |                                                           |   |
| E  | 2           | 0           |                                                                   | 1                  | 13         | 69              | 1        | 20.49     | 20.49   | 19       | 16             | 4.11            | 3.11           | 4.13            | 6.13                               | 26.1                                | 23.1                             | 4.20                              | 4.20           | 14              | 12             | 6               | 6                                   | 62.5                                 | 80                     |                                                           |                                                           |   |
| F  | 2           | 0           |                                                                   | 4                  | 18         | 61              | 2        | 20.46     |         | 25       |                | 3.83            |                |                 |                                    | 13.8                                |                                  | 0.00                              |                | 8               |                | 6               | 6                                   | 87.5                                 | 87.5                   |                                                           |                                                           |   |
| G  | 2           | 0           |                                                                   | 3                  | 5          | 67              | 2        | 20.27     | 24.27   | 20.5     | 28.5           | 2.56            | 4.56           | 4.51            | 4.51                               | 25.1                                | 29.1                             | 4.80                              | 4.80           | 13              | 13             | 5               | 5                                   | 62.5                                 | 62.5                   |                                                           |                                                           |   |
| H  | 2           | 0           |                                                                   | 1                  | 8          | 80              | 2        | 20.2      | 23.2    | 19.5     | 23.5           | 3.66            | 4.66           | 4.65            | 4.65                               | 31.1                                | 29.1                             | 3.30                              | 3.30           | 10              | 12             | 6               | 6                                   | 62.5                                 | 62.5                   |                                                           |                                                           |   |
| I  | 2           | 0           |                                                                   | 3                  | 8          | 53              | 2        | 19.97     | 26.97   | 30.5     | 34.5           | 4.07            | 4.07           | 4.04            | 5.04                               | 19.07                               | 25.07                            | 2.02                              | 8.02           | 10              | 12             | 6               | 6                                   | 62.5                                 | 83                     |                                                           |                                                           |   |
| L  | 2           | 0           |                                                                   | 3                  | 3          | 80              | 2        | 19.24     | 21.24   | 23.5     | 26.5           | 4.02            | 5.02           | 3.96            | 4.96                               | 43.3                                | 40.2                             | 9.80                              | 9.80           | 7               | 9              | 1               | 1                                   | 25                                   | 25                     |                                                           |                                                           |   |
| M  | 2           | 0           |                                                                   | 1                  | 12         | 72              | 2        | 18.86     | 21.86   | 18       | 27             | 4.11            | 4.11           | 5.12            | 4.12                               | 17.1                                | 22.1                             | 0.00                              | 5.20           | 6               | 8              | 5               | 5                                   | 25                                   | 25                     |                                                           |                                                           |   |
| N  | 2           | 0           |                                                                   | 2                  | 5          | 57              | 2        | 18.74     | 19.74   | 24.5     | 26.5           | 3.35            | 4.35           | 4.29            | 3.29                               | 16.8                                | 21.4                             | 4.70                              | 6.20           | 14              | 9              | 6               | 6                                   | 75                                   | 75                     |                                                           |                                                           |   |
| O  | 2           | 0           |                                                                   | 1                  | 13         | 56              | 2        | 15.99     | 20.99   | 8        | 17             | 2.9             | 2.9            | 3.92            | 2.92                               | 16                                  | 13                               | 1.50                              | 1.50           | 11              | 13             | 4               | 4                                   | 50                                   | 50                     |                                                           |                                                           |   |
| P  | 2           | 0           |                                                                   | 3                  | 13         | 63              | 1        | 15.49     | 20.49   | 11       | 9              | 1               | 2              | 2.02            | 4.02                               | 22.3                                | 19.3                             | 0.00                              | 3.60           | 9               | 9              | 6               | 6                                   | 12.5                                 | 20                     |                                                           |                                                           |   |
| Q  | 2           | 0           |                                                                   | 1                  | 13         | 62              | 2        | 15.49     | 18.49   | 8.5      | 11.5           | 2               | 4              | 5.03            | 6.02                               | 17.4                                | 19.4                             | 0.00                              | 0.00           | 6               | 7              | 4               | 4                                   | 50                                   | 50                     |                                                           |                                                           |   |
| R  | 2           | 0           |                                                                   | 1                  | 5          | 65              | 2        | 12.27     | 22.27   | 17.5     | 19.5           | 2.44            | 2.44           | 3.39            | 4.39                               | 20.1                                | 29.1                             | 3.80                              | 5.80           | 6               | 12             | 5               | 5                                   | 50                                   | 50                     |                                                           |                                                           |   |
| S  | 2           | 0           |                                                                   | 4                  | 8          | 62              | 1        | 12.53     | 14.47   | 0        | 10             | 3.25            | 3.25           | 4.23            | 4.23                               | 22.03                               | 26.03                            | 0.27                              | 0.27           | 3               | 5              | 6               | 6                                   | 62.5                                 | 80                     |                                                           |                                                           |   |
| T  | 2           | 0           |                                                                   | 1                  | 5          | 72              | 2        | 22.03     | 28.03   | 17       | 33             | 3.69            | 4.69           | 3.51            | 4.51                               | 20.5                                | 27                               | 2.04                              | 3.04           | 11              | 13             | 5               | 5                                   | 50                                   | 50                     |                                                           |                                                           |   |

| Feature                                       | Experimental Group<br>(n=24) | Control Group<br>(n=18) | Mann-Whitney U test,<br>p= |
|-----------------------------------------------|------------------------------|-------------------------|----------------------------|
| <i>Information</i> , correct responses at T1. | 24.0 (21.0-26.3)             | 24.0 (22.0-26.0)        | 0.005                      |
| <i>Information</i> , correct responses at T3. | 27.5 (23.8-28.0)             | 25.0 (23.0-26.0)        |                            |
| Wilcoxon's matched pairs test, p=             | 0.00014                      | NS (0.66)               |                            |
| <i>Information</i> , total time at T1, s      | 264.5 (232.8-286.5)          | 314.5 (245.5-367.3)     | NS                         |
| <i>Information</i> , total time at T3, s      | 206.0 (174.0-227.8)          | 260.0 (231.5-299.5)     |                            |
| Wilcoxon's matched pairs test, p=             | 0.00008                      | 0.009                   |                            |
| <i>Suitcase</i> , correct responses at T1     | 5.0 (3.0-7.3)                | 5.0 (3.0-9.0)           | 0.00001                    |
| <i>Suitcase</i> , correct responses at T3     | 8.0 (5.8-10.0)               | 6.0 (3.0-7.0)           |                            |
| Wilcoxon's matched pairs test, p=             | 0.00009                      | NS (0.17)               |                            |
| <i>Suitcase</i> , total time at T1, s         | 200.0 (128.0-263.8)          | 214.0 (173.0-395.0)     | 0.02                       |
| <i>Suitcase</i> , total time at T3, s         | 209.5 (162.5-288.0)          | 200.0 (173.0-258.0)     |                            |
| Wilcoxon's matched pairs test, p=             | NS (0.43)                    | NS (0.09)               |                            |
| <i>Medicines</i> , correct responses at T1    | 6.5 (4.3-8.0)                | 5.0 (3.5-6.5)           | 0.00086                    |
| <i>Medicines</i> , correct responses at T3    | 8.5 (7.3-10.0)               | 5.0 (2.0-8.0)           |                            |
| Wilcoxon's matched pairs test, p=             | 0.0005                       | NS (0.87)               |                            |
| <i>Medicines</i> , total time at T1, s        | 179.5 (156.3-230.5)          | 261.5 (218.8-377.3)     | NS                         |
| <i>Medicines</i> , total time at T3, s        | 141.5 (105.3-168.5)          | 239.0 (202.5-317.5)     |                            |
| Wilcoxon's matched pairs test, p=             | 0.001                        | NS (0.40)               |                            |
| <i>Supermarket</i> , correct responses at T1  | 10.0 (7.0-13.0)              | 9.0 (5.0-12.0)          | 0.0056                     |
| <i>Supermarket</i> , correct responses at T3  | 13.0 (11.8-14.0)             | 9.5 (5.8-12.0)          |                            |
| Wilcoxon's matched pairs test, p=             | 0.0007                       | NS (0.57)               |                            |
| <i>Supermarket</i> , total time at T1, s      | 270.0 (227.8-393.0)          | 343.0 (284.5-370.5)     | NS                         |
| <i>Supermarket</i> , total time at T3, s      | 296.5 (217.5-385.0)          | 247.0 (171.5-346.0)     |                            |
| Wilcoxon's matched pairs test, p=             | NS (0.69)                    | 0.02                    |                            |



## Non immersive Virtual Reality Training on Functional Living Skill

### SATISFACTION QUESTIONNAIRE

Now I'm going to ask you some questions about the IADL system. I kindly ask you to answer the questions truthfully. The response options are: LITTLE, ENOUGH or A LOT. Ask me for all the explanations you need if there is something that is not clear to you.

|                                                                                                                                     | LITTLE | ENOUGH | A LOT |
|-------------------------------------------------------------------------------------------------------------------------------------|--------|--------|-------|
| 1. Did you like completing the tasks with the FLS system?                                                                           |        |        |       |
| 2. Did you feel comfortable while using the FLS system?                                                                             |        |        |       |
| 3. Were FLS instructions easy to understand?                                                                                        |        |        |       |
| 4. Do you feel like you have learned new and interesting things?                                                                    |        |        |       |
| 5. * Was there anything annoying about the FLS system?                                                                              |        |        |       |
| 6. * Did you ever get tired while using the FLS system?                                                                             |        |        |       |
| 7. * Did you ever get angry while using the FLS system?                                                                             |        |        |       |
| 8. * Did you think the FLS system was not working properly?                                                                         |        |        |       |
| 9. * Is there anything about the FLS system that you didn't like?                                                                   |        |        |       |
| 10. Do you prefer using the FLS system rather than traditional rehabilitation in which you have to write down answers on the sheet? |        |        |       |
| 11. Would you like new games to be developed similar to the ones you used?                                                          |        |        |       |
| 12. Would you like to continue using the FLS system in the future?                                                                  |        |        |       |
| 13. Would you recommend the use of the FLS system to other people?                                                                  |        |        |       |

**Score:**

**0 =little**

**1=enough**

**2 =a lot**

**Reverse scores in items marked with an asterisk.**
